# Supplementary material
Source: PubMed Central journal article supplement (PMC6398206)
Supplement: 138089_1_supp_206763_pfd9fh.pdf [file 138089_1_supp_206763_pfd9fh.pdf]

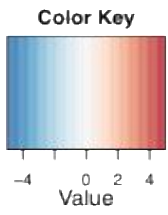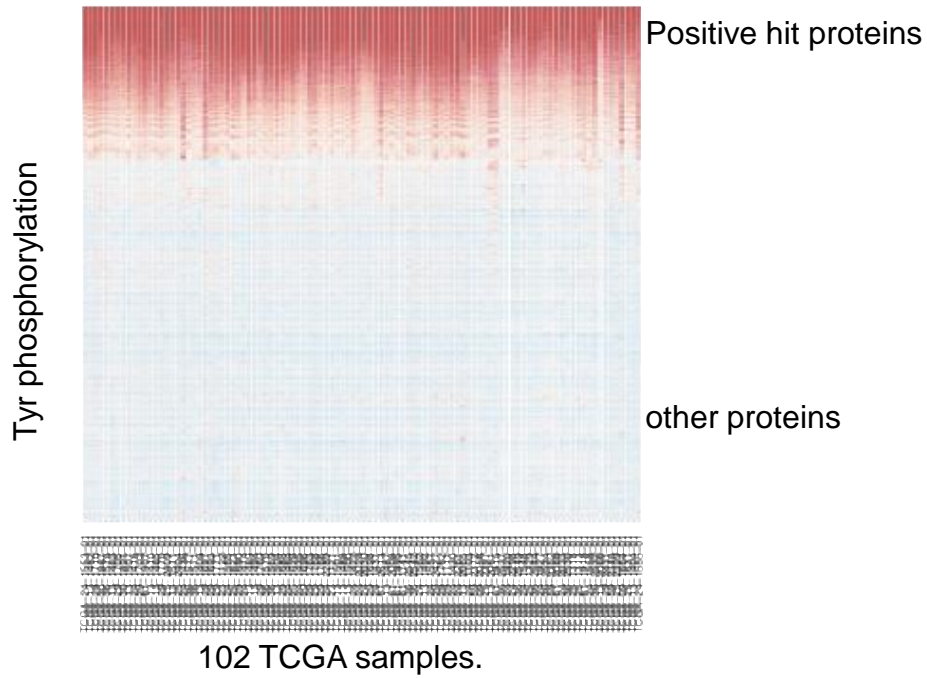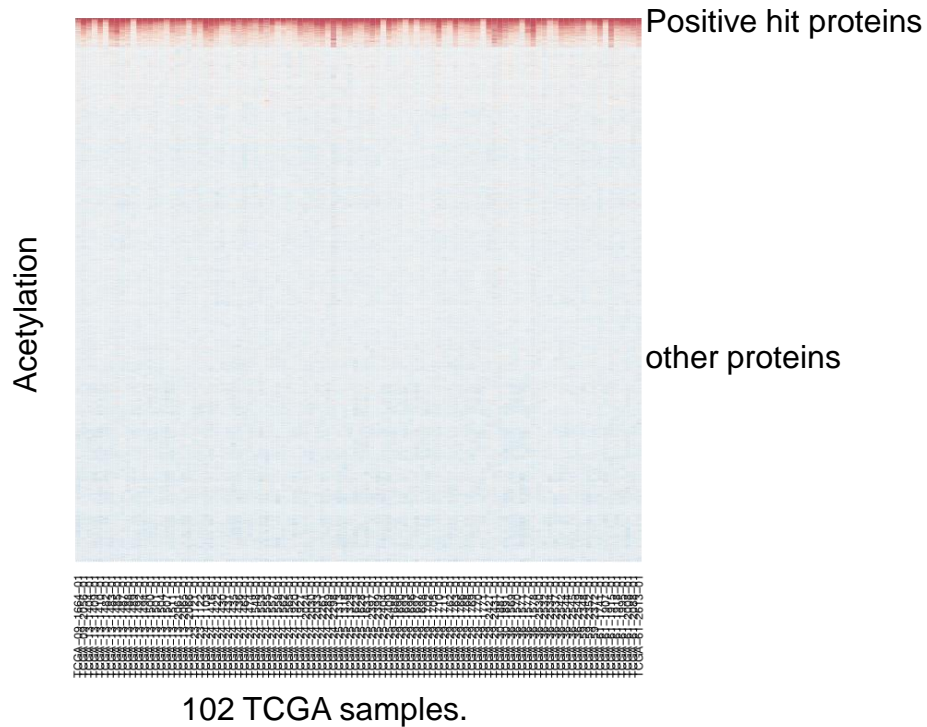

Supplemental Fig. S1. Positive hits distributions of both Tyr phosphorylation and Lys acetylation among the 102 TCGA samples. A stringent cutoff ( $Z \geq 5$ ) was used to determine the positives targets in this study.
